# Supplementary material for: The use of Facebook in medical education – A literature review
Source: PubMed Central journal article supplement — GMS Z Med Ausbild. 2014 Aug 15;31(3):Doc33. doi: 10.3205/zma000925 (PMC4152997; doi:10.3205/zma000925), 2014-08-15
Supplement: ZMA-31-33-s-001.pdf [file ZMA-31-33-s-001.pdf]

| Authors (Year)       | Title                                                                                                                                 | Country   | Phase of medical training*      | Study content                                                    | Study design                                                    | Reported results                                                                                                                                                                                               |
|----------------------|---------------------------------------------------------------------------------------------------------------------------------------|-----------|---------------------------------|------------------------------------------------------------------|-----------------------------------------------------------------|----------------------------------------------------------------------------------------------------------------------------------------------------------------------------------------------------------------|
| George et al. (2012) | Facebook stress management group for Year 1 medical students.                                                                         | US        | Undergraduate medical education | - Learning and teaching environment                              | Observational, project report                                   | Successful implementation of stress management forum in FB and good student acceptance. No quantification.                                                                                                     |
| Mena et al. (2012)   | The willingness of medical students to use Facebook as a training channel for professional habits: the case of influenza vaccination. | Spain     | Undergraduate medical education | - Learning and teaching environment                              | Quantitative, observational, cross-sectional study              | n = 410, 67.1 % would accept invitation to FB page with information on influenza vaccination                                                                                                                   |
| Garner et al. (2010) | Facebook and the professional behaviours of undergraduate medical students.                                                           | UK        | Undergraduate medical education | - Digital professionalism                                        | Quantitative, Observational, cross-sectional study              | n = 56, 96% with FB profile, 52% with unprofessional images, 10% with no privacy limiting.                                                                                                                     |
| Gray et al. (2010)   | Medical students' use of Facebook to support learning: insights from four case studies.                                               | Australia | Undergraduate medical education | - Learning and teaching environment                              | Mixed method design, cross-sectional study, in-depth interviews | n = 759, 87 % use FB, 25.5% use FB also for educational purposes, heterogeneous qualitative data, no conclusive evidence for specific benefits of Facebook use for learning.                                   |
| Finn et al. (2010)   | 'You're judged all the time!' Students' views on professionalism: a multicentre study.                                                | UK        | Undergraduate medical education | - Digital professionalism                                        | Qualitative study, focus-groups                                 | n = 72, Key theme 'Identity' with subthemes 'Virtual identity' being part of undergraduate medical students' perceptions of becoming a physician.                                                              |
| Ponce et al. (2013)  | Social networking profiles and professionalism issues in residency applicants: an original study-cohort study.                        | US        | Graduate medical education      | - Digital professionalism                                        | Quantitative, observational, cross-sectional study              | n = 806, 46% have FB profiles, 16% with unprofessional content, (based on professionalism score and ACGME guidelines).                                                                                         |
| Kung et al. (2012)   | Reflective practice as a tool to teach digital professionalism                                                                        | US        | Graduate medical education      | - Teaching Facebook professionalism<br>- Digital professionalism | Quantitative, observational, cross-sectional study              | n = 25, 40% use FB daily, 50% witnessed unprofessional posting, "Session added to my understanding of professionalism" 3.92 (1 – strongly disagree, 5 strongly agree). Case-based teaching method is feasible. |

|                        |                                                                                               |             |                                                                |                                                                  |                                                                          |                                                                                                                                                                                |
|------------------------|-----------------------------------------------------------------------------------------------|-------------|----------------------------------------------------------------|------------------------------------------------------------------|--------------------------------------------------------------------------|--------------------------------------------------------------------------------------------------------------------------------------------------------------------------------|
| Golden et al. (2012)   | Social networking and professionalism in otolaryngology residency applicants.                 | US          | Graduate medical education                                     | - Digital professionalism                                        | Quantitative, observational, cross-sectional study                       | n = 234, 51% with identifiable FB accounts, 36% publicly accessible, 11% with questionable or clear violations of professionalism (based on professionalism score).            |
| Ginory et al. (2012)   | Addressing therapeutic boundaries in social networking.                                       | US          | Graduate medical education                                     | - Digital professionalism                                        | Quantitative, observational, cross-sectional study                       | n = 182, 95.7% with FB profiles, 12.3% with public accounts, 35.5% posted work-related content. 9.7% received contact requests from patients, 18.7% viewed patients' profiles. |
| Baer et al. (2011)     | Teaching professionalism in the digital age on the psychiatric consultation-liaison service.  | US          | Graduate medical education                                     | - Digital professionalism<br>- Teaching Facebook professionalism | Quantitative, observational, cross-sectional study, review               | n = 36, 83% with FB profile, 14% publicly accessible. Developed two case vignettes for bedside teaching based on literature and expert opinions.                               |
| McDonald et al. (2010) | Privacy, professionalism and Facebook: a dilemma for young doctors.                           | New Zealand | Graduate medical education                                     | - Digital professionalism                                        | Quantitative, observational, cross-sectional study                       | n = 338, 65% with FB profile, 37% publicly accessible, of which 10% showed alcohol use/abuse.                                                                                  |
| Wang et al. (2012)     | Using social media to improve continuing medical education: a survey of course participants.  | US          | Continuing medical education                                   | - Learning and teaching environment                              | Quantitative, observational, cross-sectional study                       | n = 327, 50% with FB profile. Significant positive association between favorable attitude towards FB and young age.                                                            |
| Thompson et al. (2011) | Protected health information on social networking sites: ethical and legal considerations.    | US          | Different phases (Undergraduate and graduate medical students) | - Digital professionalism                                        | Quantitative, observational, two cross-sectional studies (2007 and 2009) | n = 1023, 44.5% (2007) and 52.5% with identifiable FB profiles, 0.003% (2007) 0.02% (2009) with publicly accessible potential privacy violations.                              |
| Moubarak et al. (2011) | Facebook activity of residents and fellows and its impact on the doctor-patient relationship. | France      | Different phases (Graduate and continuing medical education)   | - Digital professionalism                                        | Quantitative, observational, cross-sectional study                       | n = 202, 73% with identifiable FB profile, 39% with publicly accessible FB profile, 0.02% with patient contact on FB. No data on privacy or professionalism violations.        |

|                       |                                                                                                                                    |       |                                                                              |                                     |                                                          |                                                                                                                                                                                                            |
|-----------------------|------------------------------------------------------------------------------------------------------------------------------------|-------|------------------------------------------------------------------------------|-------------------------------------|----------------------------------------------------------|------------------------------------------------------------------------------------------------------------------------------------------------------------------------------------------------------------|
| Landman et al. (2010) | Guidelines for maintaining a professional compass in the era of social networking.                                                 | US    | Different phases (Graduate and continuing medical education)                 | - Digital professionalism           | Quantitative, observational, cross-sectional survey      | n = 215, 64% of residents and 22% of faculty with identifiable FB profiles. 50% of residents and faculty with publicly accessible profiles. Evidence of violations of professionalism (no quantification). |
| Pimmer et al. (2012)  | Facebook as a learning tool? A case study on the appropriation of social network sites from mobile phones in developing countries. | Nepal | Different phases (Undergraduate, graduate and continuing medical education). | - Learning and teaching environment | Qualitative study, semi-structured in – depth interviews | n = 43, emerging themes include acceptance and use of FB as learning environment, forms of interaction and aspects of professional identity.                                                               |

\* Phases refer to undergraduate, graduate and continuing medical education in terms of the U.S. medical education system or equivalent phases of medical training in other systems. FB = Facebook.
